# Supplementary material for: Hyperdiploid tumor cells increase phenotypic heterogeneity within Glioblastoma tumors
Source: Royal Society of Chemistry journal article supplement (doi:10.1039/c3mb70484j), 2014-01-13

## Chromosome 1

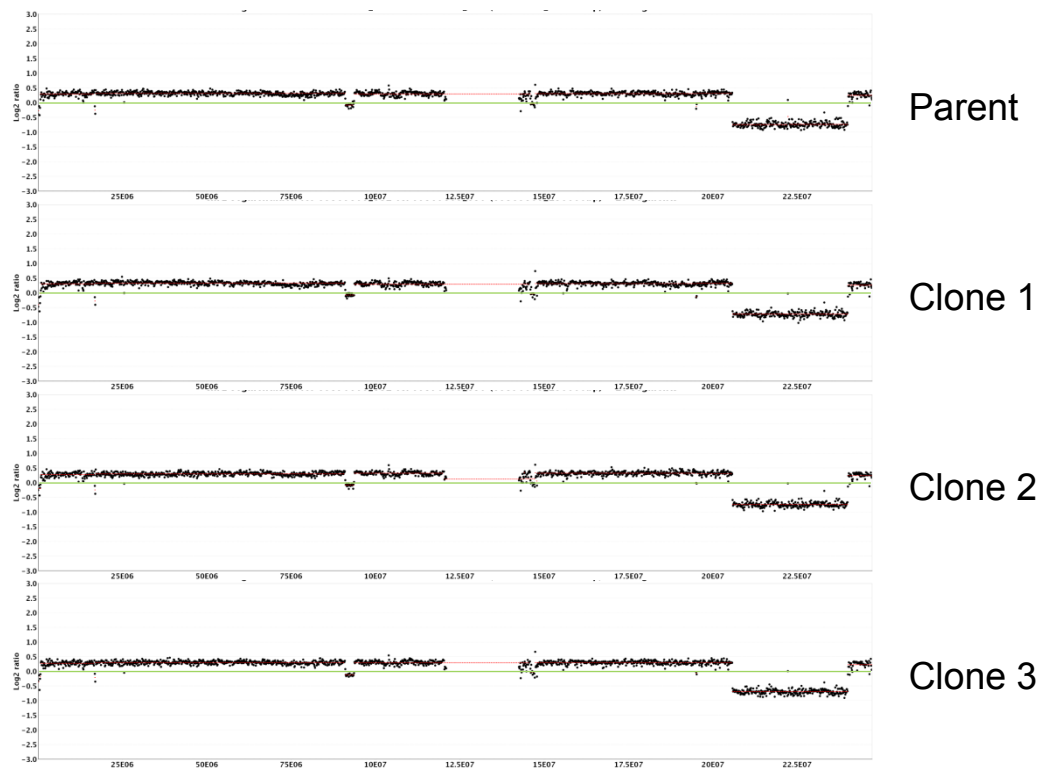

## Chromosome 2

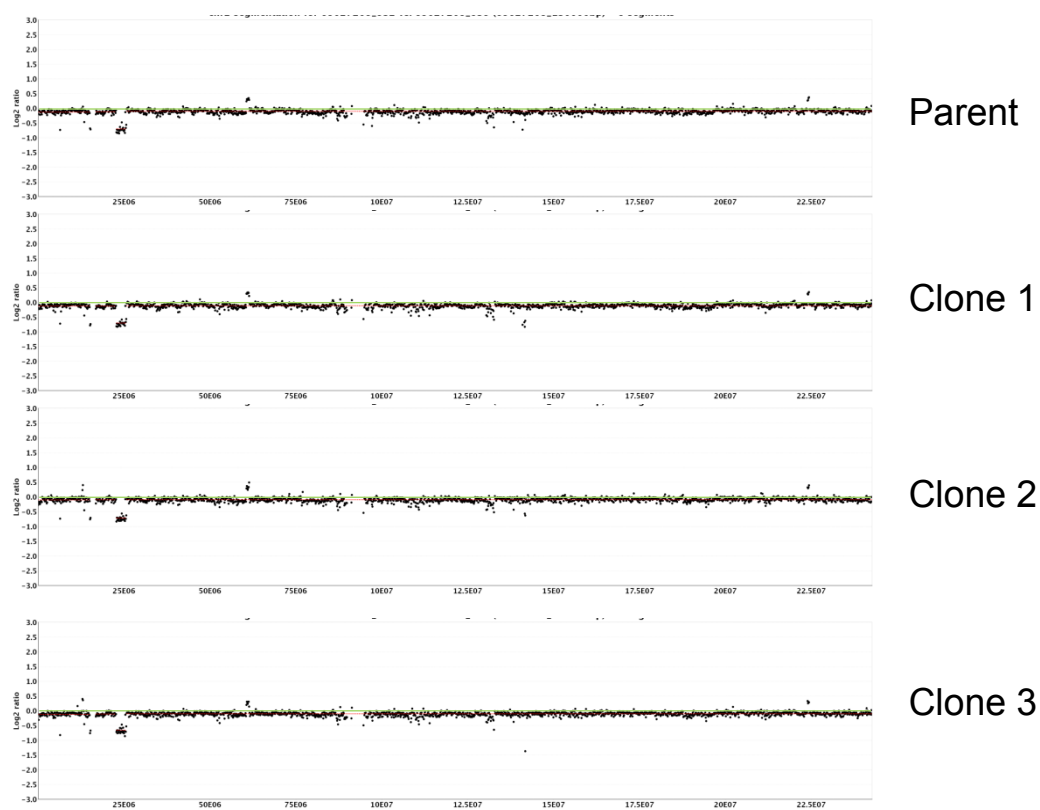

## Chromosome 3

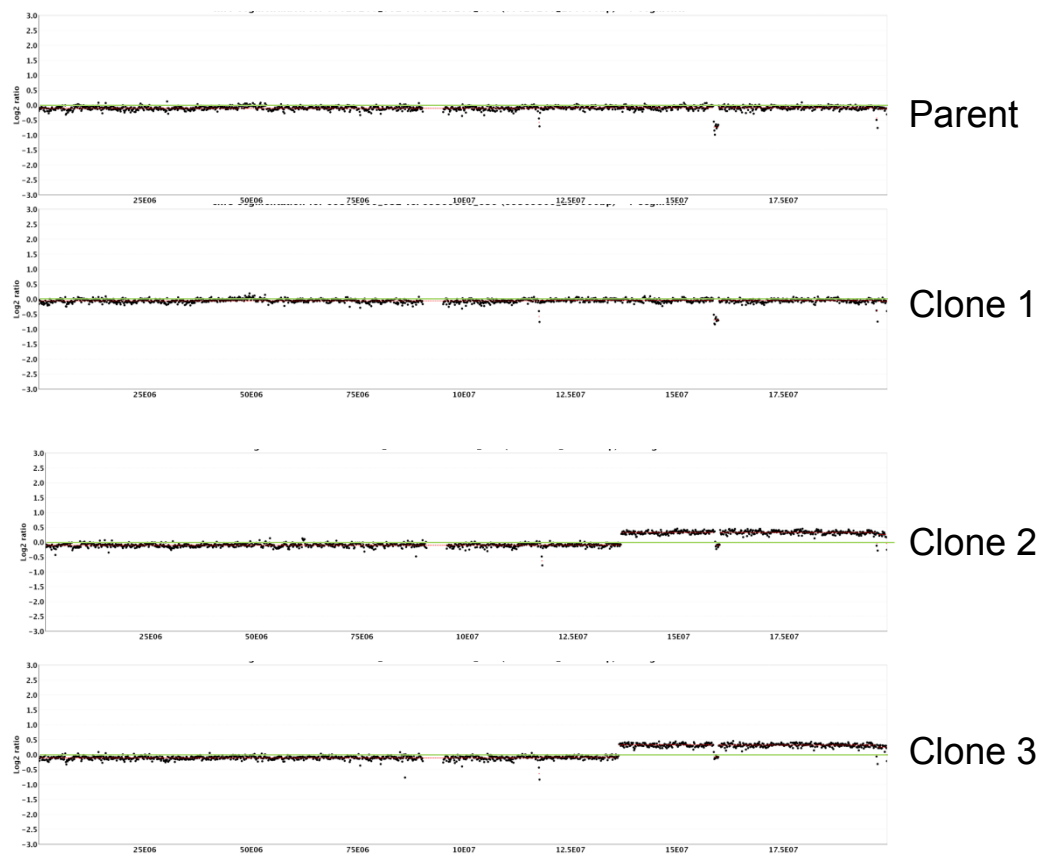

## Chromosome 4

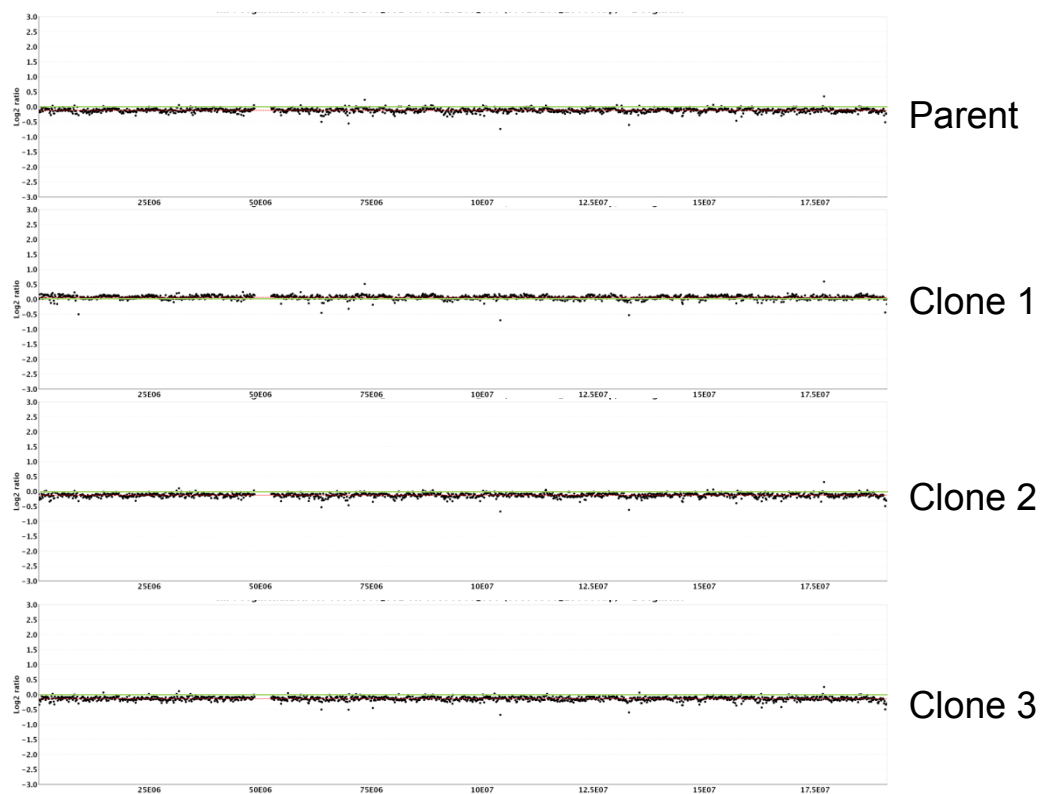

## Chromosome 5

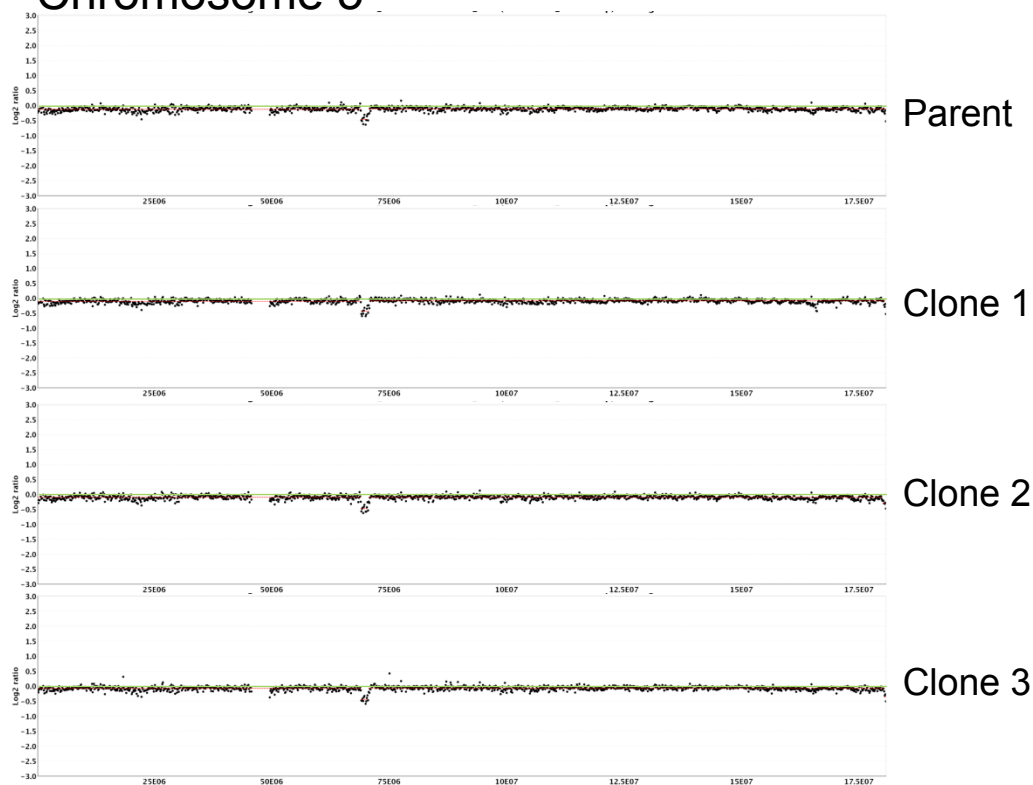

## Chromosome 6

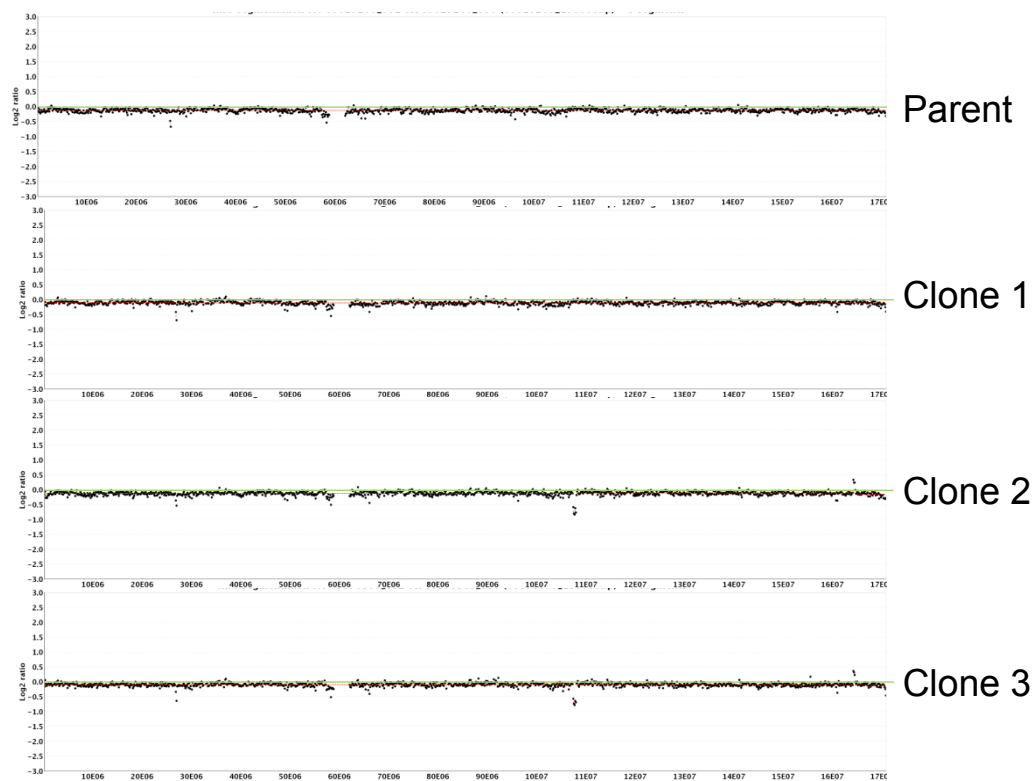

## Chromosome 7

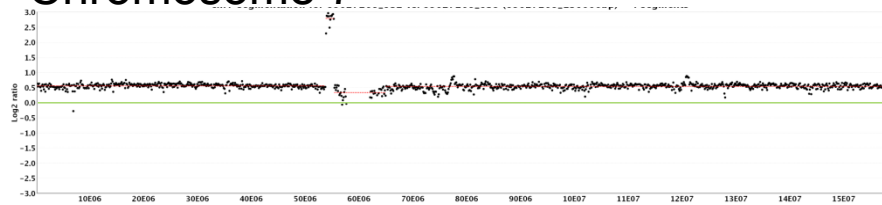

Parent

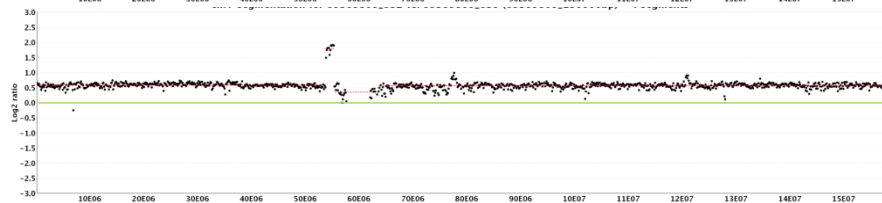

Clone 1

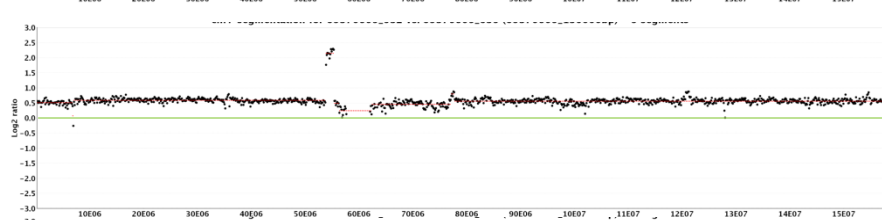

Clone 2

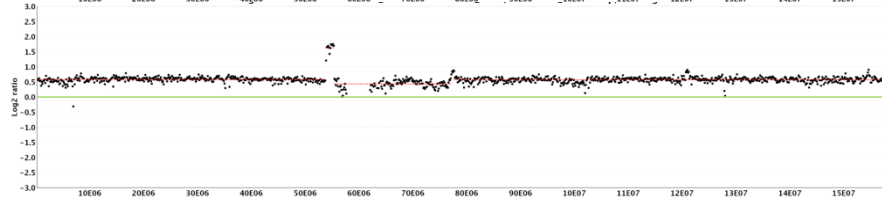

Clone 3

## Chromosome 8

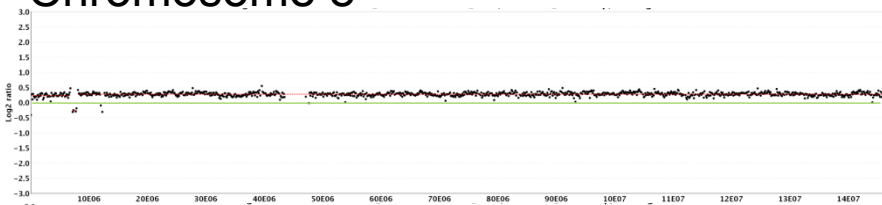

Parent

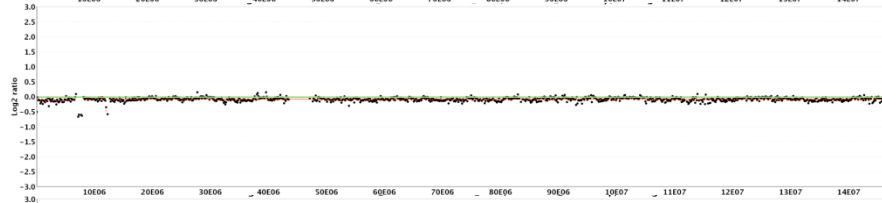

Clone 1

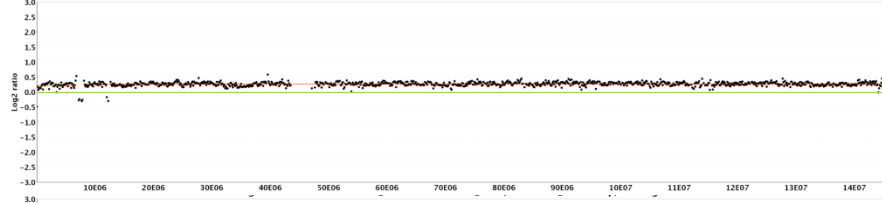

Clone 2

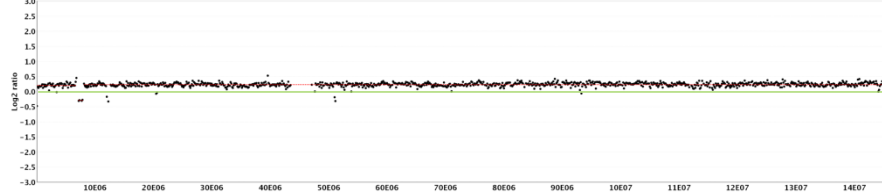

Clone 3

## Chromosome 9

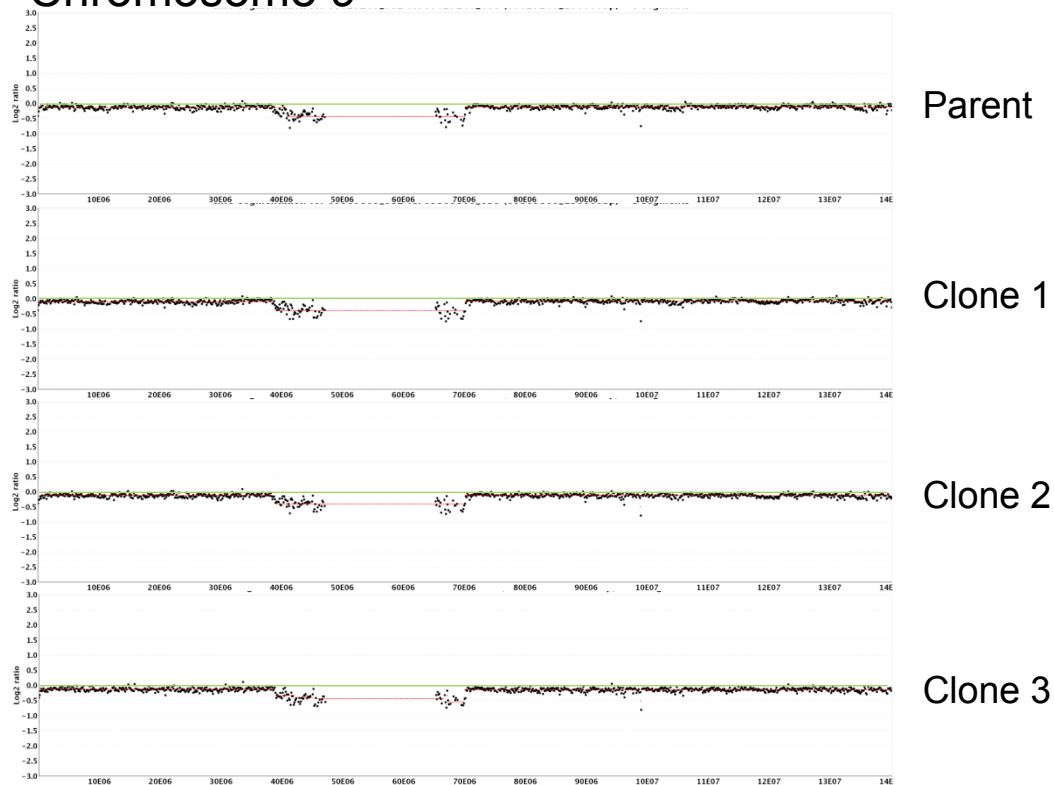

## Chromosome 10

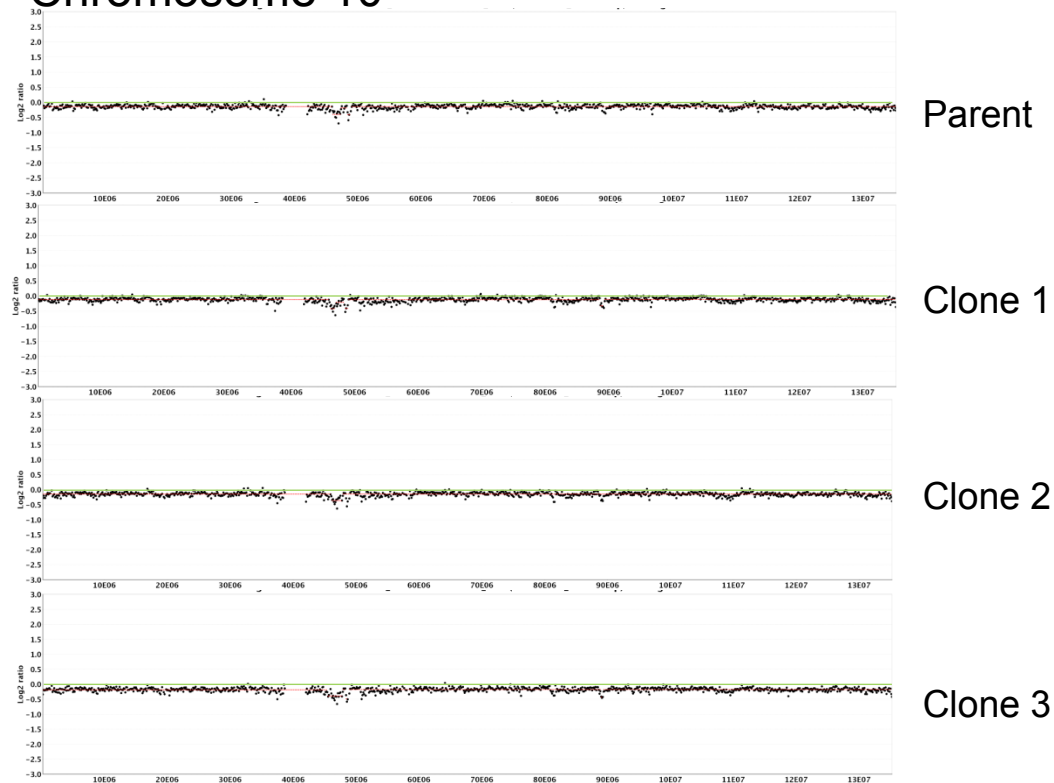

## Chromosome 11

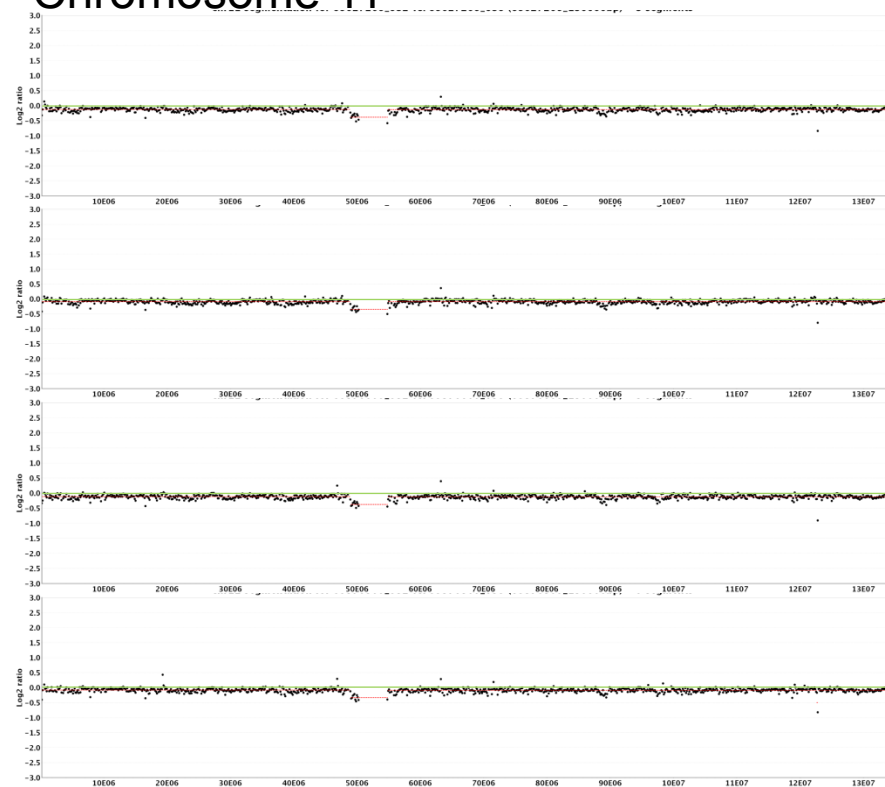

Parent

Clone 1

Clone 2

Clone 3

## Chromosome 12

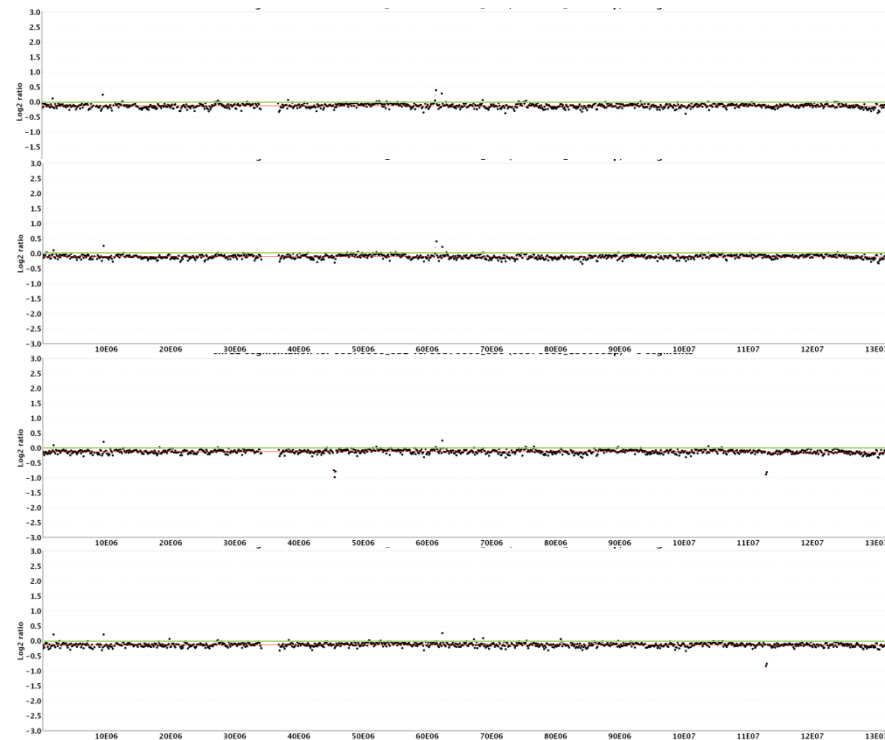

Parent

Clone 1

Clone 2

Clone 3

## Chromosome 13

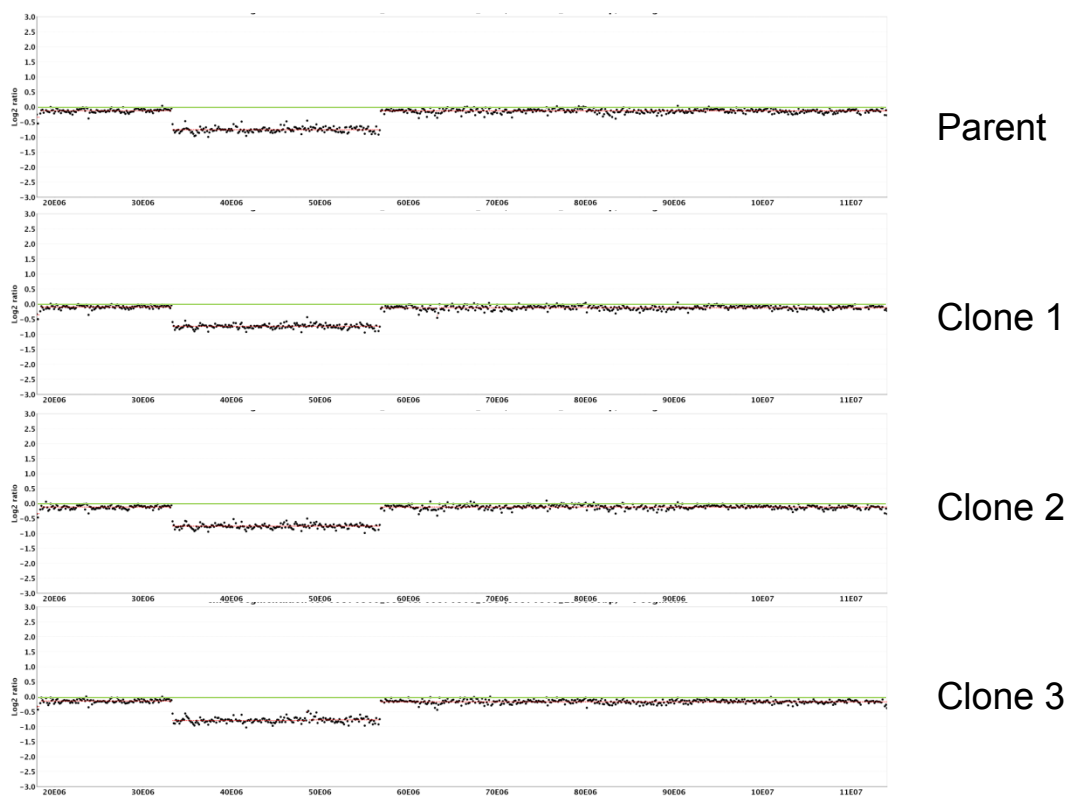

## Chromosome 14

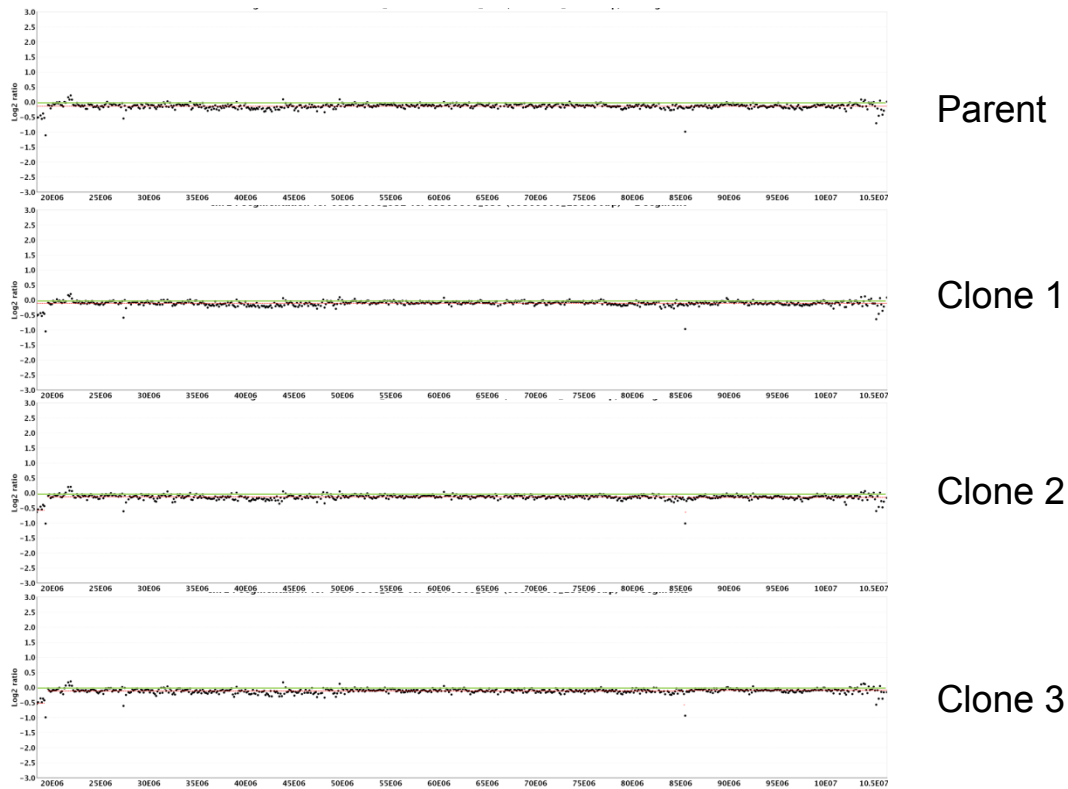

# Chromosome 15

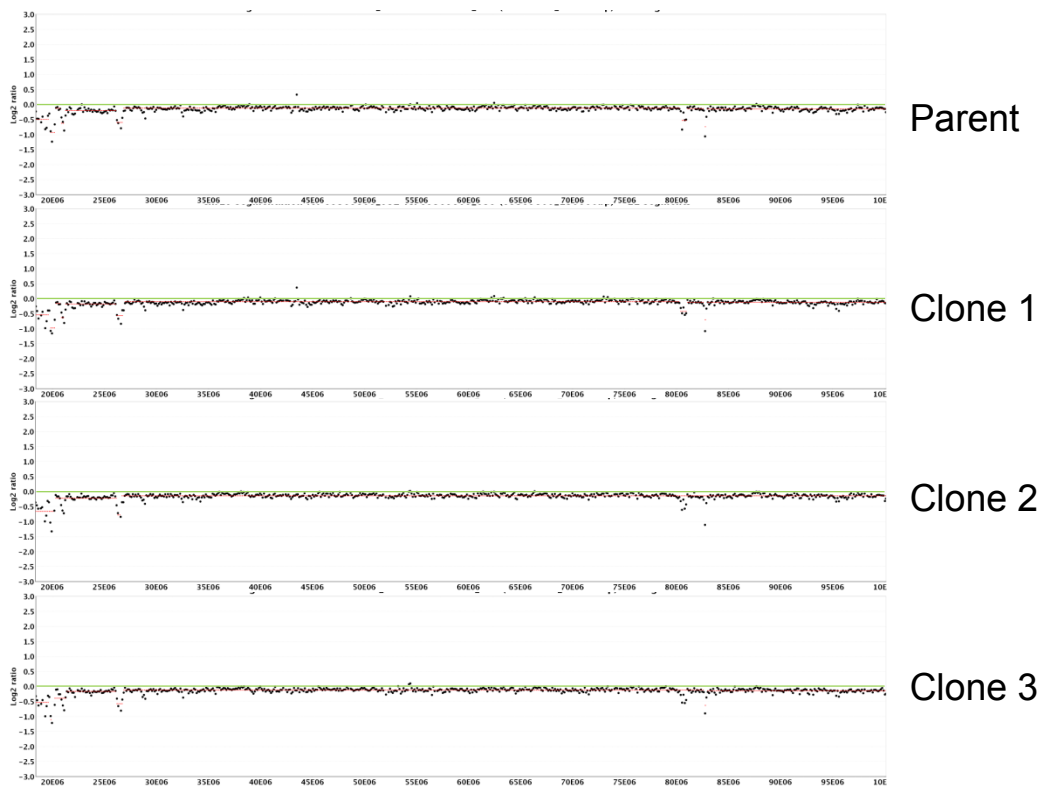

# Chromosome 16

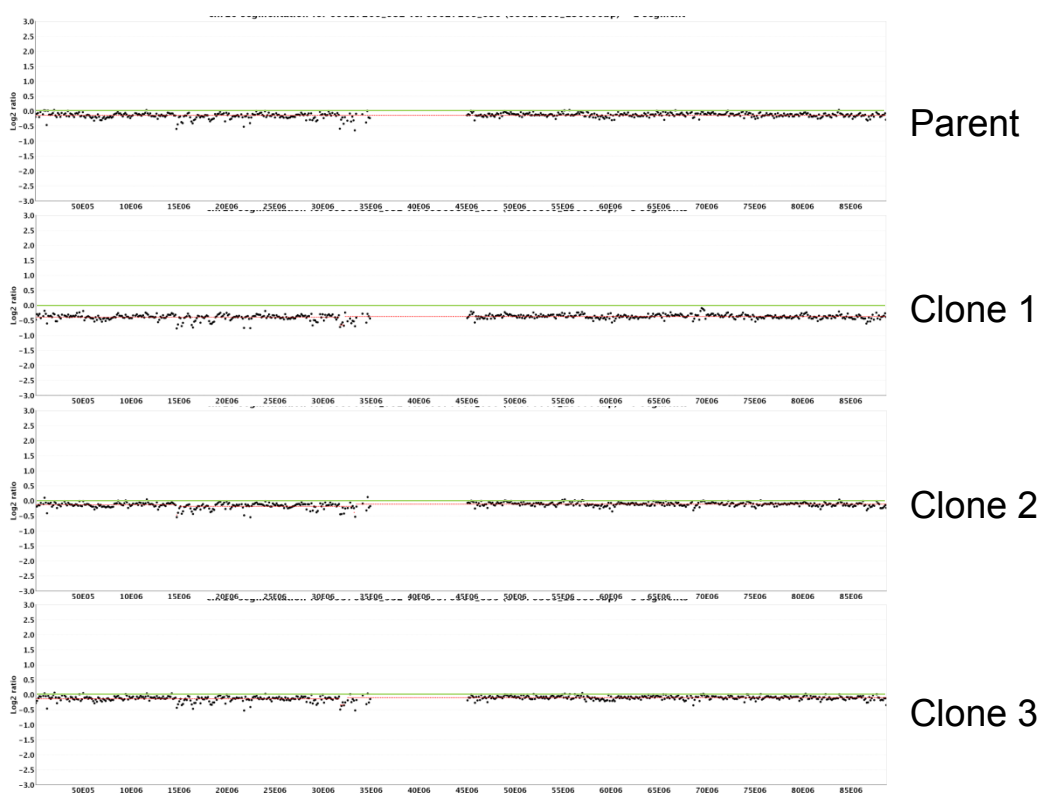



## Chromosome 17

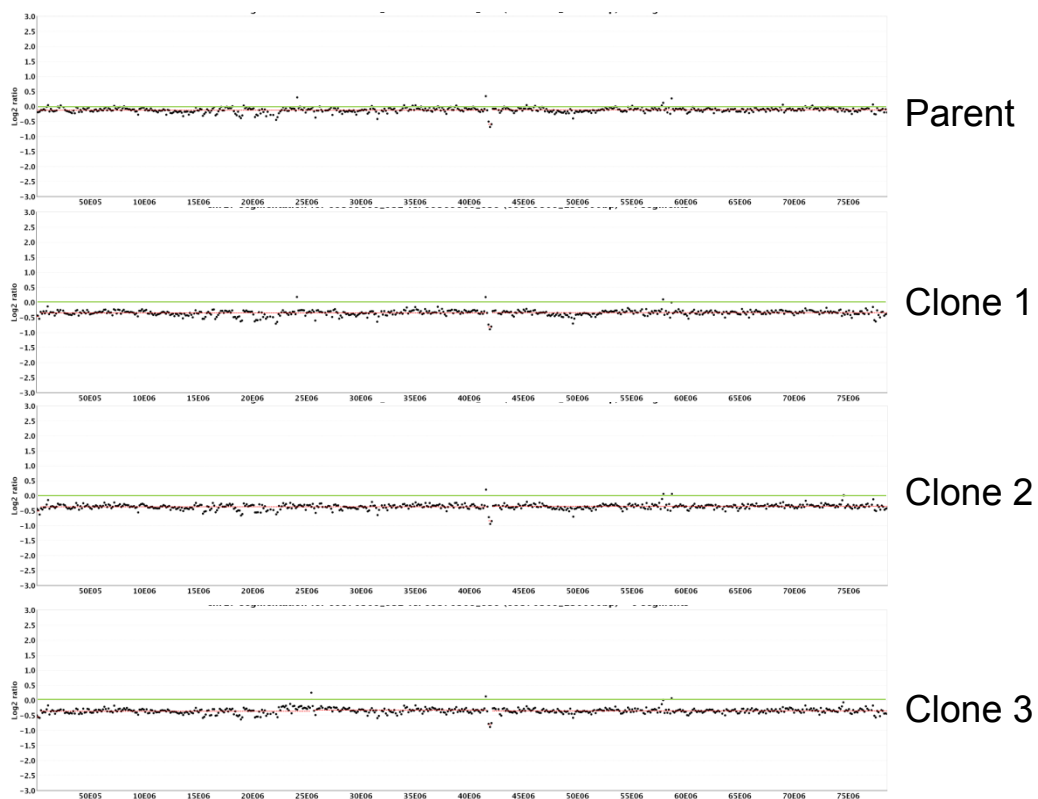

## Chromosome 18

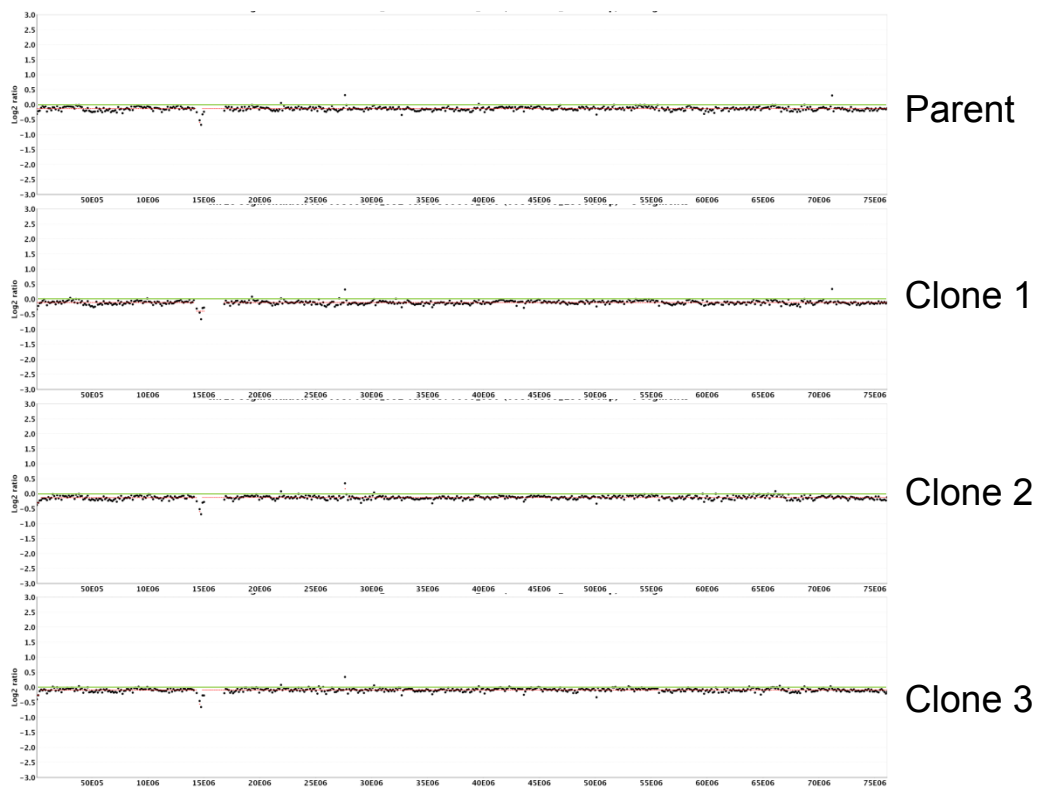

## Chromosome 19

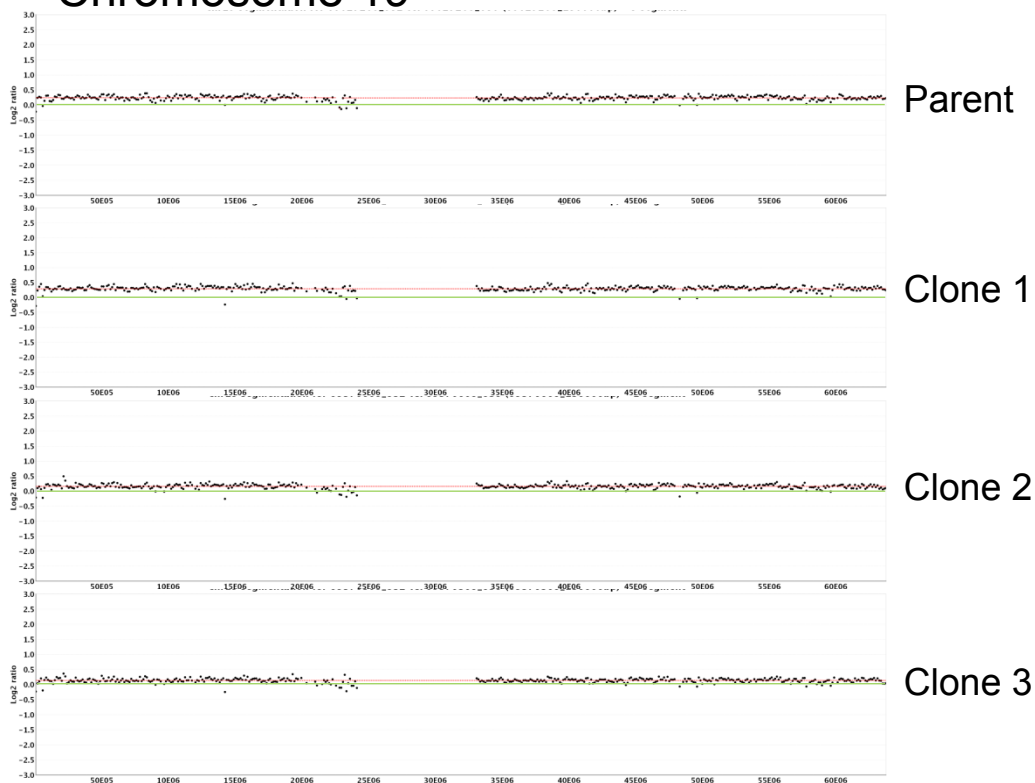

## Chromosome 20

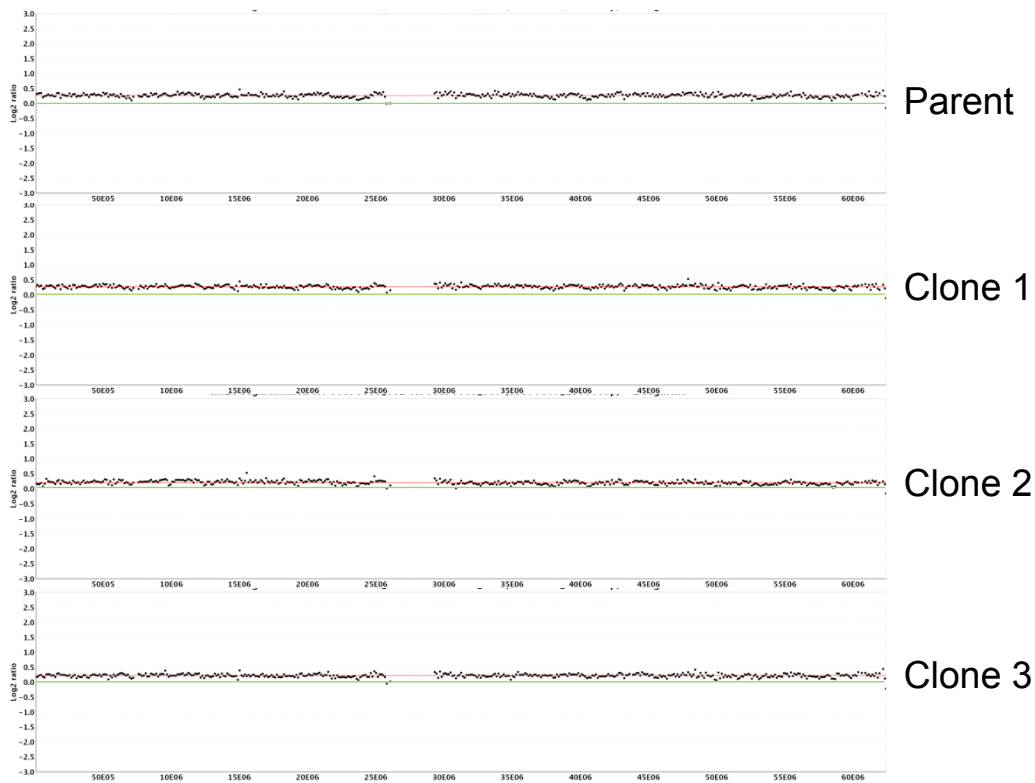

# Chromosome 21

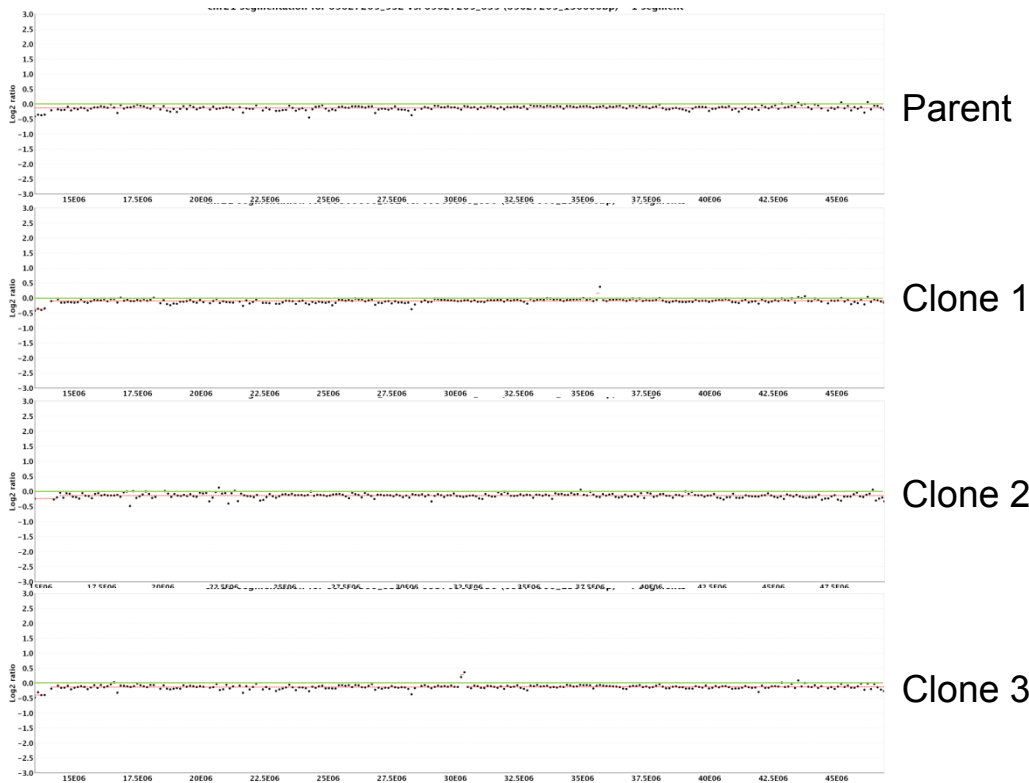

# Chromosome 22

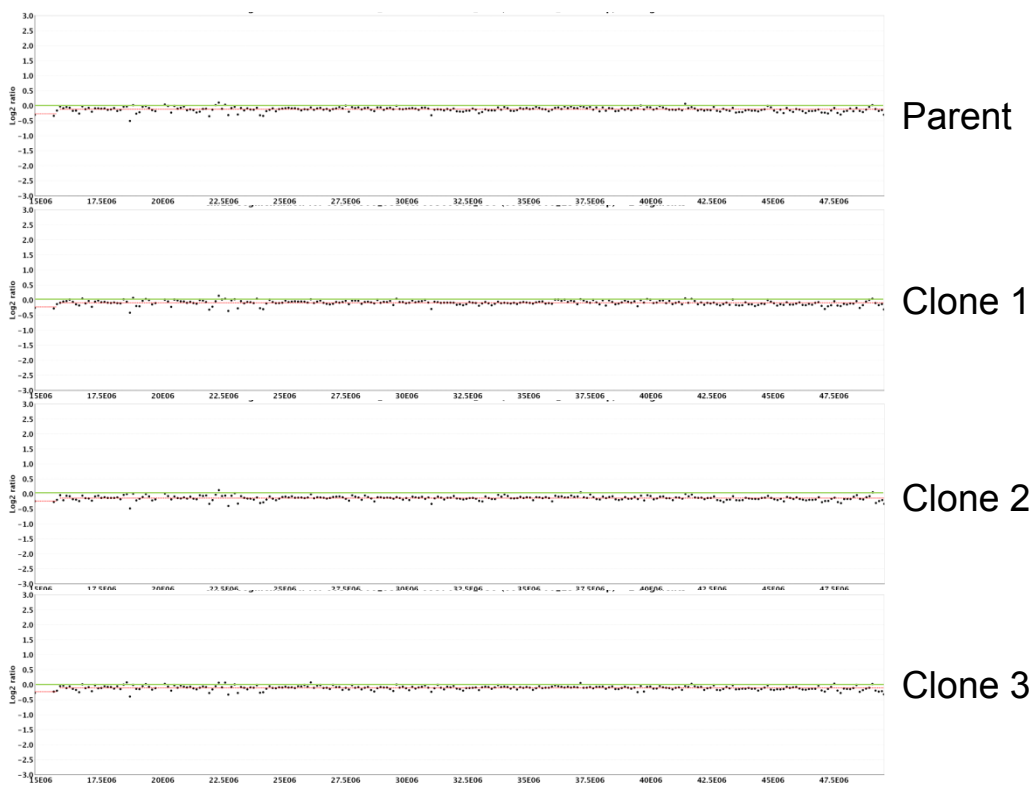

## Chromosome X

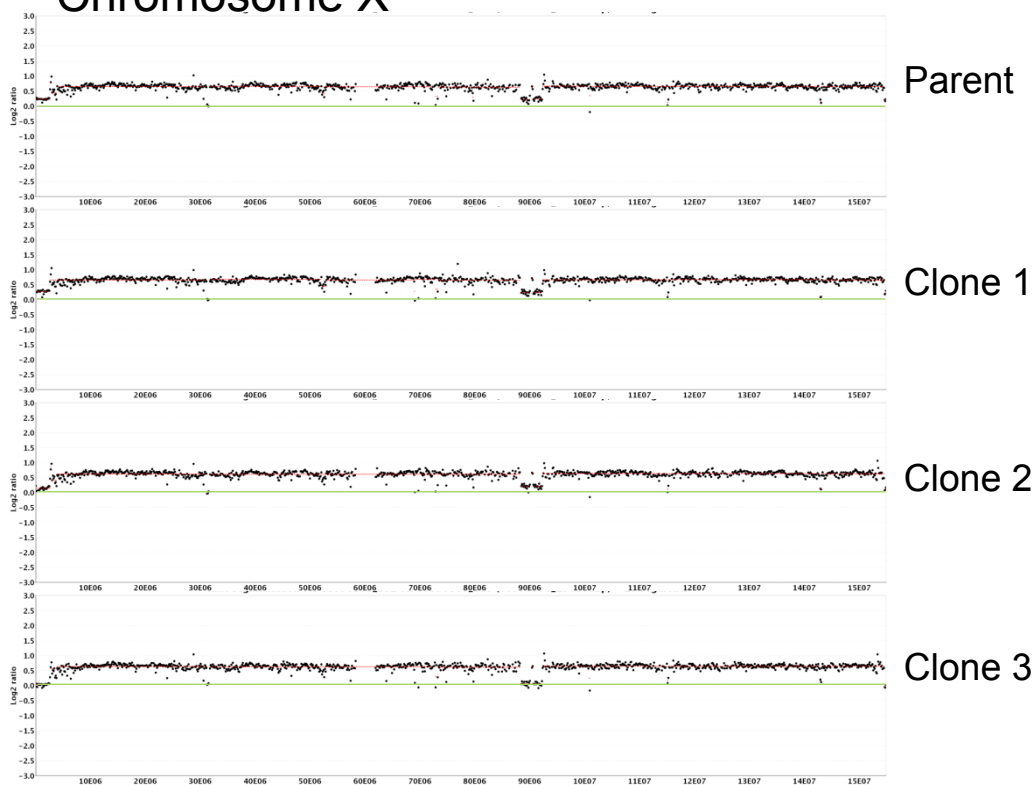

## Chromosome X

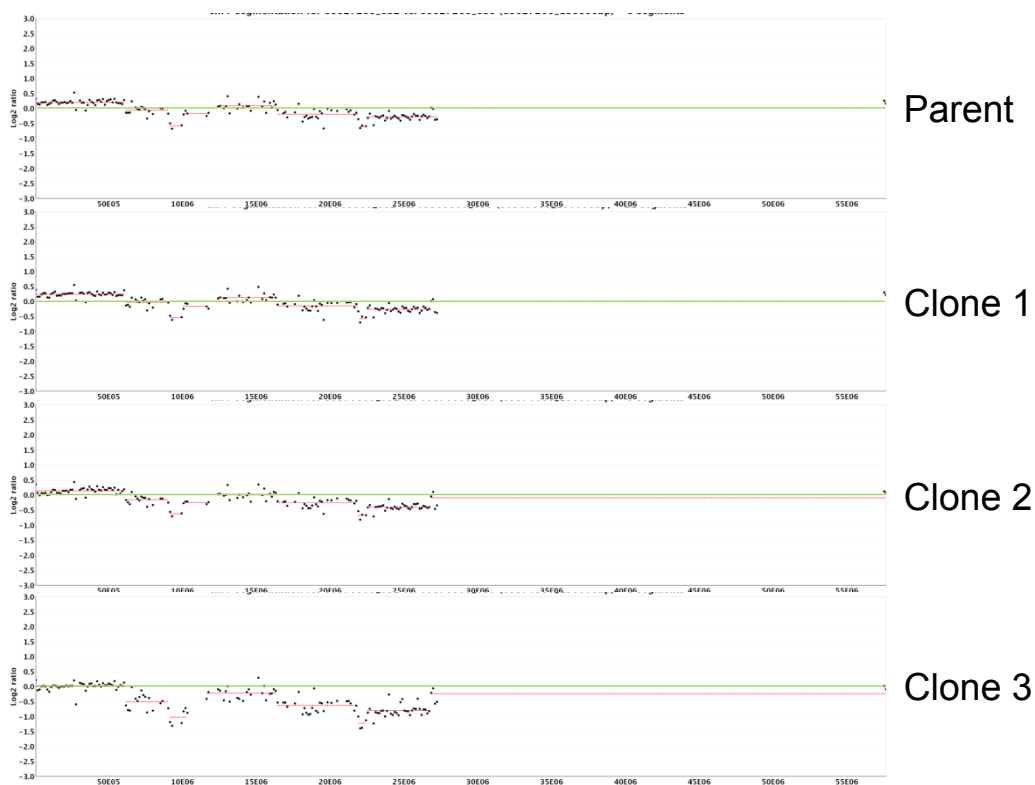

Supplement: c3mb70484j.pdf [file c3mb70484j.pdf]
